# Supplementary material
Source: ML conference proceedings conference paper supplement (https://proceedings.neurips.cc/paper_files/paper/2017/hash/7cce53cf90577442771720a370c3c723-Abstract.html)
Supplement: Supplementary file [file 7cce53cf90577442771720a370c3c723-Supplemental.zip]

## A Supplementary experimental results

Due to limited space, we considered the surrogate loss without the zero-one loss in Figure 1. Here, we include the zero-one loss and show the extended version of Figure 1 in Figure 4. In general, the curves of risks w.r.t.  $\ell_{01}$  look quite similar to (but less smooth than) those w.r.t.  $\ell_{\text{sig}}$ . Therefore, the curves of risks w.r.t.  $\ell_{\text{sig}}$  are more visually appealing as the illustrative experimental results.

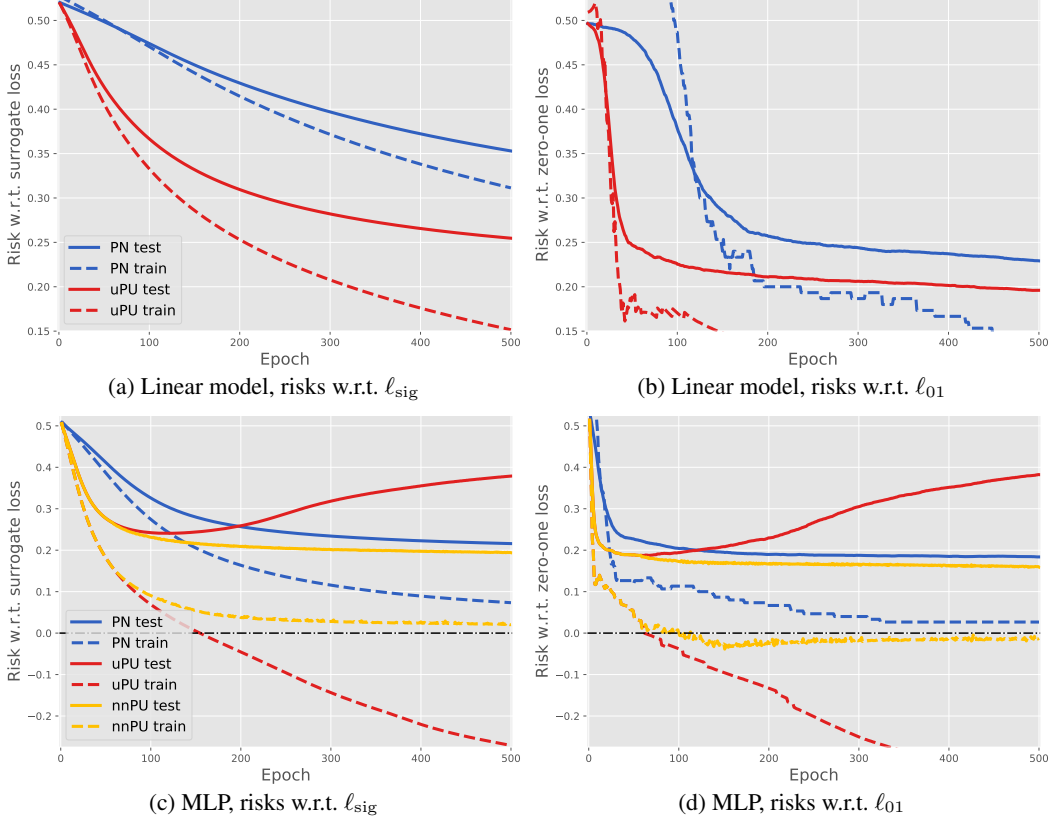

Figure 4: The extended version of Figure 1.

## B Proofs

In this appendix, we prove all the theoretical results in Section 4.

### B.1 Proof of Lemma 1

Let

$$p_{\mathcal{P}}(\mathcal{X}_{\mathcal{P}}) = p_{\mathcal{P}}(x_1^{\mathcal{P}}) \cdots p_{\mathcal{P}}(x_{n_{\mathcal{P}}}^{\mathcal{P}}), \quad p(\mathcal{X}_{\mathcal{U}}) = p(x_1^{\mathcal{U}}) \cdots p(x_{n_{\mathcal{U}}}^{\mathcal{U}})$$

be the probability density functions of  $\mathcal{X}_{\mathcal{P}}$  and  $\mathcal{X}_{\mathcal{U}}$ . Then let  $F_{\mathcal{P}}(\mathcal{X}_{\mathcal{P}})$  be the cumulative distribution function of  $\mathcal{X}_{\mathcal{P}}$ ,  $F_{\mathcal{U}}(\mathcal{X}_{\mathcal{U}})$  be that of  $\mathcal{X}_{\mathcal{U}}$ , and

$$F(\mathcal{X}_{\mathcal{P}}, \mathcal{X}_{\mathcal{U}}) = F_{\mathcal{P}}(\mathcal{X}_{\mathcal{P}}) \cdot F_{\mathcal{U}}(\mathcal{X}_{\mathcal{U}})$$

be the joint cumulative distribution function of  $(\mathcal{X}_{\mathcal{P}}, \mathcal{X}_{\mathcal{U}})$ . Given the above definitions, the measure of  $\mathfrak{D}^-(g)$  is defined by

$$\Pr(\mathfrak{D}^-(g)) = \int_{(\mathcal{X}_{\mathcal{P}}, \mathcal{X}_{\mathcal{U}}) \in \mathfrak{D}^-(g)} dF(\mathcal{X}_{\mathcal{P}}, \mathcal{X}_{\mathcal{U}}),$$

where  $\Pr$  denotes the probability. Since  $\tilde{R}_{\text{pu}}(g)$  is identical to  $\hat{R}_{\text{pu}}(g)$  on  $\mathfrak{D}^+(g)$  and different from  $\hat{R}_{\text{pu}}(g)$  on  $\mathfrak{D}^-(g)$ , we have  $\Pr(\mathfrak{D}^-(g)) = \Pr\{\tilde{R}_{\text{pu}}(g) \neq \hat{R}_{\text{pu}}(g)\}$ . That is, the measure of  $\mathfrak{D}^-(g)$  is non-zero if and only if  $\tilde{R}_{\text{pu}}(g)$  differs from  $\hat{R}_{\text{pu}}(g)$  with a non-zero probability.

Based on the facts that  $\hat{R}_{\text{pu}}(g)$  is unbiased and  $\tilde{R}_{\text{pu}}(g) - \hat{R}_{\text{pu}}(g) = 0$  on  $\mathfrak{D}^+(g)$ , we have

$$\begin{aligned}\mathbb{E}[\tilde{R}_{\text{pu}}(g)] - R(g) &= \mathbb{E}[\tilde{R}_{\text{pu}}(g) - \hat{R}_{\text{pu}}(g)] \\ &= \int_{(\mathcal{X}_{\text{p}}, \mathcal{X}_{\text{u}}) \in \mathfrak{D}^+(g)} \tilde{R}_{\text{pu}}(g) - \hat{R}_{\text{pu}}(g) \, dF(\mathcal{X}_{\text{p}}, \mathcal{X}_{\text{u}}) \\ &\quad + \int_{(\mathcal{X}_{\text{p}}, \mathcal{X}_{\text{u}}) \in \mathfrak{D}^-(g)} \tilde{R}_{\text{pu}}(g) - \hat{R}_{\text{pu}}(g) \, dF(\mathcal{X}_{\text{p}}, \mathcal{X}_{\text{u}}) \\ &= \int_{(\mathcal{X}_{\text{p}}, \mathcal{X}_{\text{u}}) \in \mathfrak{D}^-(g)} \tilde{R}_{\text{pu}}(g) - \hat{R}_{\text{pu}}(g) \, dF(\mathcal{X}_{\text{p}}, \mathcal{X}_{\text{u}}).\end{aligned}$$

As a result,  $\mathbb{E}[\tilde{R}_{\text{pu}}(g)] - R(g) > 0$  if and only if  $\int_{(\mathcal{X}_{\text{p}}, \mathcal{X}_{\text{u}}) \in \mathfrak{D}^-(g)} dF(\mathcal{X}_{\text{p}}, \mathcal{X}_{\text{u}}) > 0$  due to the fact  $\tilde{R}_{\text{pu}}(g) - \hat{R}_{\text{pu}}(g) > 0$  on  $\mathfrak{D}^-(g)$ . That is, the bias of  $\tilde{R}_{\text{pu}}(g)$  is positive if and only if the measure of  $\mathfrak{D}^-(g)$  is non-zero.

We prove (7) by *the method of bounded differences*, for that

$$\mathbb{E}[\hat{R}_{\text{u}}^-(g) - \pi_{\text{p}} \hat{R}_{\text{p}}^-(g)] = R_{\text{u}}^-(g) - \pi_{\text{p}} R_{\text{p}}^-(g) = R_{\text{n}}^-(g) \geq \alpha.$$

We have assumed that  $0 \leq \ell(t, \pm 1) \leq C_{\ell}$ , and thus the change of  $\hat{R}_{\text{p}}^-(g)$  will be no more than  $C_{\ell}/n_{\text{p}}$  if some  $x_i^{\text{p}} \in \mathcal{X}_{\text{p}}$  is replaced, or the change of  $\hat{R}_{\text{u}}^-(g)$  will be no more than  $C_{\ell}/n_{\text{u}}$  if some  $x_i^{\text{u}} \in \mathcal{X}_{\text{u}}$  is replaced. Subsequently, *McDiarmid's inequality* [47] implies

$$\begin{aligned}\Pr\{R_{\text{n}}^-(g) - (\hat{R}_{\text{u}}^-(g) - \pi_{\text{p}} \hat{R}_{\text{p}}^-(g)) \geq \alpha\} &\leq \exp\left(-\frac{2\alpha^2}{n_{\text{p}}(C_{\ell}\pi_{\text{p}}/n_{\text{p}})^2 + n_{\text{u}}(C_{\ell}/n_{\text{u}})^2}\right) \\ &= \exp\left(-\frac{2\alpha^2/C_{\ell}^2}{\pi_{\text{p}}^2/n_{\text{p}} + 1/n_{\text{u}}}\right).\end{aligned}$$

Taking into account that

$$\begin{aligned}\Pr(\mathfrak{D}^-(g)) &= \Pr\{\hat{R}_{\text{u}}^-(g) - \pi_{\text{p}} \hat{R}_{\text{p}}^-(g) < 0\} \\ &\leq \Pr\{\hat{R}_{\text{u}}^-(g) - \pi_{\text{p}} \hat{R}_{\text{p}}^-(g) \leq R_{\text{n}}^-(g) - \alpha\} \\ &= \Pr\{R_{\text{n}}^-(g) - (\hat{R}_{\text{u}}^-(g) - \pi_{\text{p}} \hat{R}_{\text{p}}^-(g)) \geq \alpha\},\end{aligned}$$

we complete the proof.  $\square$

## B.2 Proof of Theorem 2

It has been proven in Lemma 1 that

$$\mathbb{E}[\tilde{R}_{\text{pu}}(g)] - R(g) = \int_{(\mathcal{X}_{\text{p}}, \mathcal{X}_{\text{u}}) \in \mathfrak{D}^-(g)} \tilde{R}_{\text{pu}}(g) - \hat{R}_{\text{pu}}(g) \, dF(\mathcal{X}_{\text{p}}, \mathcal{X}_{\text{u}}),$$

and thus the exponential decay of the bias in (8) is obtained via

$$\begin{aligned}\mathbb{E}[\tilde{R}_{\text{pu}}(g)] - R(g) &\leq \sup_{(\mathcal{X}_{\text{p}}, \mathcal{X}_{\text{u}}) \in \mathfrak{D}^-(g)} (\tilde{R}_{\text{pu}}(g) - \hat{R}_{\text{pu}}(g)) \cdot \int_{(\mathcal{X}_{\text{p}}, \mathcal{X}_{\text{u}}) \in \mathfrak{D}^-(g)} dF(\mathcal{X}_{\text{p}}, \mathcal{X}_{\text{u}}) \\ &= \sup_{(\mathcal{X}_{\text{p}}, \mathcal{X}_{\text{u}}) \in \mathfrak{D}^-(g)} (\pi_{\text{p}} \hat{R}_{\text{p}}^-(g) - \hat{R}_{\text{u}}^-(g)) \cdot \Pr(\mathfrak{D}^-(g)) \\ &\leq C_{\ell} \pi_{\text{p}} \Delta_g.\end{aligned}$$

The deviation bound (9) is due to

$$\begin{aligned}|\tilde{R}_{\text{pu}}(g) - R(g)| &\leq |\tilde{R}_{\text{pu}}(g) - \mathbb{E}[\tilde{R}_{\text{pu}}(g)]| + |\mathbb{E}[\tilde{R}_{\text{pu}}(g)] - R(g)| \\ &\leq |\tilde{R}_{\text{pu}}(g) - \mathbb{E}[\tilde{R}_{\text{pu}}(g)]| + C_{\ell} \pi_{\text{p}} \Delta_g.\end{aligned}$$

The change of  $\tilde{R}_{\text{pu}}(g)$  will be no more than  $2C_\ell/n_p$  if some  $x_i^p \in \mathcal{X}_p$  is replaced, or it will be no more than  $C_\ell/n_u$  if some  $x_i^u \in \mathcal{X}_u$  is replaced, and McDiarmid's inequality gives us

$$\Pr\{|\tilde{R}_{\text{pu}}(g) - \mathbb{E}[\tilde{R}_{\text{pu}}(g)]| \geq \epsilon\} \leq 2 \exp\left(-\frac{2\epsilon^2}{n_p(2C_\ell\pi_p/n_p)^2 + n_u(C_\ell/n_u)^2}\right),$$

or equivalently, with probability at least  $1 - \delta$ ,

$$\begin{aligned} |\tilde{R}_{\text{pu}}(g) - \mathbb{E}[\tilde{R}_{\text{pu}}(g)]| &\leq \sqrt{\frac{\ln(2/\delta)C_\ell^2}{2} \left(\frac{4\pi_p^2}{n_p} + \frac{1}{n_u}\right)} \\ &\leq C_\delta \left(\frac{2\pi_p}{\sqrt{n_p}} + \frac{1}{\sqrt{n_u}}\right) \\ &= C_\delta \cdot \chi_{n_p, n_u}. \end{aligned}$$

On the other hand, the deviation bound (10) is due to

$$|\tilde{R}_{\text{pu}}(g) - R(g)| \leq |\tilde{R}_{\text{pu}}(g) - \hat{R}_{\text{pu}}(g)| + |\hat{R}_{\text{pu}}(g) - R(g)|,$$

where  $|\tilde{R}_{\text{pu}}(g) - \hat{R}_{\text{pu}}(g)| > 0$  with probability at most  $\Delta_g$ , and  $|\hat{R}_{\text{pu}}(g) - R(g)|$  shares the same concentration inequality with  $|\tilde{R}_{\text{pu}}(g) - \mathbb{E}[\tilde{R}_{\text{pu}}(g)]|$ .  $\square$

### B.3 Proof of Theorem 3

For convenience, let  $A = \pi_p \hat{R}_p^+(g)$  and  $B = \hat{R}_u^-(g) - \pi_p \hat{R}_p^-(g)$ , so that

$$R(g) = \mathbb{E}[A + B], \quad \hat{R}_{\text{pu}}(g) = A + B, \quad \tilde{R}_{\text{pu}}(g) = A + B_+,$$

where  $B_+ = \max\{0, B\}$ . Subsequently, let  $R = R(g)$  for short, and then by definition,

$$\begin{aligned} \text{MSE}(\hat{R}_{\text{pu}}(g)) &= \mathbb{E}[(A + B - R)^2] \\ &= \mathbb{E}[(A + B)^2] - 2R \cdot \mathbb{E}[A + B] + R^2, \\ \text{MSE}(\tilde{R}_{\text{pu}}(g)) &= \mathbb{E}[(A + B_+ - R)^2] \\ &= \mathbb{E}[(A + B_+)^2] - 2R \cdot \mathbb{E}[A + B_+] + R^2. \end{aligned}$$

Hence,

$$\begin{aligned} \text{MSE}(\hat{R}_{\text{pu}}(g)) - \text{MSE}(\tilde{R}_{\text{pu}}(g)) &= \mathbb{E}[(A + B)^2] - \mathbb{E}[(A + B_+)^2] \\ &\quad - 2R \cdot (\mathbb{E}[A + B] - \mathbb{E}[A + B_+]). \end{aligned}$$

The first part  $\mathbb{E}[(A + B)^2] - \mathbb{E}[(A + B_+)^2]$  can be rewritten as

$$\begin{aligned} \mathbb{E}[(A + B)^2] - \mathbb{E}[(A + B_+)^2] &= \mathbb{E}[2A(B - B_+) + B^2 - B_+^2] \\ &= \int_{(\mathcal{X}_p, \mathcal{X}_u) \in \mathfrak{D}^+(g)} 2A(B - B) + B^2 - B^2 dF(\mathcal{X}_p, \mathcal{X}_u) \\ &\quad + \int_{(\mathcal{X}_p, \mathcal{X}_u) \in \mathfrak{D}^-(g)} 2A(B - 0) + B^2 - 0^2 dF(\mathcal{X}_p, \mathcal{X}_u) \\ &= \int_{(\mathcal{X}_p, \mathcal{X}_u) \in \mathfrak{D}^-(g)} 2AB + B^2 dF(\mathcal{X}_p, \mathcal{X}_u). \end{aligned}$$

The second part  $2R \cdot (\mathbb{E}[A + B] - \mathbb{E}[A + B_+])$  can be rewritten as

$$\begin{aligned} 2R \cdot (\mathbb{E}[A + B] - \mathbb{E}[A + B_+]) &= 2R \cdot \mathbb{E}[B - B_+] \\ &= 2R \cdot \int_{(\mathcal{X}_p, \mathcal{X}_u) \in \mathfrak{D}^+(g)} B - B dF(\mathcal{X}_p, \mathcal{X}_u) \\ &\quad + 2R \cdot \int_{(\mathcal{X}_p, \mathcal{X}_u) \in \mathfrak{D}^-(g)} B - 0 dF(\mathcal{X}_p, \mathcal{X}_u) \\ &= \int_{(\mathcal{X}_p, \mathcal{X}_u) \in \mathfrak{D}^-(g)} 2RB dF(\mathcal{X}_p, \mathcal{X}_u). \end{aligned}$$

As a consequence,

$$\text{MSE}(\widehat{R}_{\text{pu}}(g)) - \text{MSE}(\widetilde{R}_{\text{pu}}(g)) = \int_{(\mathcal{X}_{\text{p}}, \mathcal{X}_{\text{u}}) \in \mathfrak{D}^-(g)} (2A + B - 2R)B \, dF(\mathcal{X}_{\text{p}}, \mathcal{X}_{\text{u}}),$$

which is exactly the left-hand side of (11) since  $\widetilde{R}_{\text{pu}}(g) = A$  on  $\mathfrak{D}^-(g)$ .

In order to prove the rest, it suffices to show that  $A - R \leq B$  on  $\mathfrak{D}^-(g)$ . By the assumption that  $\ell$  satisfies (3),

$$\begin{aligned} A - R &= A - \mathbb{E}[A] - \mathbb{E}[B] \\ &= \pi_{\text{p}} \widehat{R}_{\text{p}}^+(g) - \pi_{\text{p}} R_{\text{p}}^+(g) - \mathbb{E}[B] \\ &= \pi_{\text{p}} R_{\text{p}}^-(g) - \pi_{\text{p}} \widehat{R}_{\text{p}}^-(g) - \mathbb{E}[B]. \end{aligned}$$

Thus, with probability one,

$$\begin{aligned} A - R &= \pi_{\text{p}} R_{\text{p}}^-(g) - \pi_{\text{p}} \widehat{R}_{\text{p}}^-(g) - \mathbb{E}[B] + (\widehat{R}_{\text{u}}^-(g) - \widehat{R}_{\text{u}}^-(g)) + (R_{\text{u}}^-(g) - R_{\text{u}}^-(g)) \\ &= (\widehat{R}_{\text{u}}^-(g) - \pi_{\text{p}} \widehat{R}_{\text{p}}^-(g)) - (R_{\text{u}}^-(g) - \pi_{\text{p}} R_{\text{p}}^-(g)) - \mathbb{E}[B] + (R_{\text{u}}^-(g) - \widehat{R}_{\text{u}}^-(g)) \\ &= B - 2\mathbb{E}[B] + (R_{\text{u}}^-(g) - \widehat{R}_{\text{u}}^-(g)) \\ &\leq B, \end{aligned}$$

where we used the assumptions that  $\mathbb{E}[B] \geq \alpha$  and  $R_{\text{u}}^-(g) - \widehat{R}_{\text{u}}^-(g) \leq 2\alpha$  almost surely on  $\mathfrak{D}^-(g)$ . To sum up, we have established that

$$\int_{(\mathcal{X}_{\text{p}}, \mathcal{X}_{\text{u}}) \in \mathfrak{D}^-(g)} (2A + B - 2R)B \, dF(\mathcal{X}_{\text{p}}, \mathcal{X}_{\text{u}}) \geq 3 \int_{(\mathcal{X}_{\text{p}}, \mathcal{X}_{\text{u}}) \in \mathfrak{D}^-(g)} B^2 \, dF(\mathcal{X}_{\text{p}}, \mathcal{X}_{\text{u}}).$$

Due to the fact that  $B^2 > 0$  on  $\mathfrak{D}^-(g)$  and the assumption that  $\Pr(\mathfrak{D}^-(g)) > 0$ , we know Eq. (11) is valid. Finally, for any  $0 \leq \beta \leq C_{\ell} \pi_{\text{p}}$ , it is clear that

$$\{(\mathcal{X}_{\text{p}}, \mathcal{X}_{\text{u}}) \mid B < -\beta\} \subseteq \{(\mathcal{X}_{\text{p}}, \mathcal{X}_{\text{u}}) \mid B < 0\} = \mathfrak{D}^-(g),$$

and  $B < -\beta$  if and only if  $\widetilde{R}_{\text{pu}}(g) - \widehat{R}_{\text{pu}}(g) > \beta$ . These two facts imply that

$$\begin{aligned} \int_{(\mathcal{X}_{\text{p}}, \mathcal{X}_{\text{u}}) \in \mathfrak{D}^-(g)} B^2 \, dF(\mathcal{X}_{\text{p}}, \mathcal{X}_{\text{u}}) &\geq \int_{(\mathcal{X}_{\text{p}}, \mathcal{X}_{\text{u}}) \mid B < -\beta} B^2 \, dF(\mathcal{X}_{\text{p}}, \mathcal{X}_{\text{u}}) \\ &\geq \beta^2 \int_{(\mathcal{X}_{\text{p}}, \mathcal{X}_{\text{u}}) \mid B < -\beta} dF(\mathcal{X}_{\text{p}}, \mathcal{X}_{\text{u}}) \\ &= \beta^2 \Pr\{B < -\beta\} \\ &= \beta^2 \Pr\{\widetilde{R}_{\text{pu}}(g) - \widehat{R}_{\text{pu}}(g) > \beta\}, \end{aligned}$$

which proves (12) and the whole theorem.  $\square$

#### B.4 Proof of Lemma 5

**Preliminary** An alternative definition of the Rademacher complexity will be used in the proof:

$$\mathfrak{R}'_{n,q}(\mathcal{G}) = \mathbb{E}_{\mathcal{X}} \mathbb{E}_{\sigma_1, \dots, \sigma_n} \left[ \sup_{g \in \mathcal{G}} \left| \frac{1}{n} \sum_{x_i \in \mathcal{X}} \sigma_i g(x_i) \right| \right].$$

For the sake of comparison, the one we have used in the statements of theoretical results is

$$\mathfrak{R}_{n,q}(\mathcal{G}) = \mathbb{E}_{\mathcal{X}} \mathbb{E}_{\sigma_1, \dots, \sigma_n} \left[ \sup_{g \in \mathcal{G}} \frac{1}{n} \sum_{x_i \in \mathcal{X}} \sigma_i g(x_i) \right].$$

This alternative version comes from [35, 36] of which authors are the pioneers of error bounds based on the Rademacher complexity. Without any composition,  $\mathfrak{R}'_{n,q}(\mathcal{G}) \geq \mathfrak{R}_{n,q}(\mathcal{G})$  for arbitrary  $\mathcal{G}$  and  $\mathfrak{R}'_{n,q}(\mathcal{G}) = \mathfrak{R}_{n,q}(\mathcal{G})$  if  $\mathcal{G}$  is closed under negation. However, with a composition

$$\ell \circ \mathcal{G} = \{\ell \circ g \mid g \in \mathcal{G}\}$$

where the loss  $\ell$  is non-negative, the Rademacher complexity of the *composite function class* would generally not satisfy  $\mathfrak{R}'_{n,q}(\ell \circ \mathcal{G}) = \mathfrak{R}_{n,q}(\ell \circ \mathcal{G})$  since  $\ell \circ \mathcal{G}$  is generally not closed under negation. Furthermore, a vital disagreement arises when considering the contraction principle or property: if  $\psi : \mathbb{R} \rightarrow \mathbb{R}$  is a Lipschitz continuous function with a Lipschitz constant  $L_\psi$  and satisfies  $\psi(0) = 0$ , we have

$$\begin{aligned}\mathfrak{R}_{n,q}(\psi \circ \mathcal{G}) &\leq L_\psi \mathfrak{R}_{n,q}(\mathcal{G}), \\ \mathfrak{R}'_{n,q}(\psi \circ \mathcal{G}) &\leq 2L_\psi \mathfrak{R}'_{n,q}(\mathcal{G}),\end{aligned}$$

according to *Talagrand's contraction lemma* [48] and its extension [28, 49]. Here, for  $\mathfrak{R}_{n,q}(\psi \circ \mathcal{G})$  we can use Lemma 4.2 in [28] or Lemma 26.9 in [49] where  $\psi(0) = 0$  is safely dropped, while for  $\mathfrak{R}'_{n,q}(\psi \circ \mathcal{G})$  we have to use the original Theorem 4.12 in [48] where  $\psi(0) = 0$  is required. In fact, the name of the lemma is after that  $\psi$  is a contraction if  $\psi(0) = 0$  and  $L_\psi = 1$ .

**Proof** Firstly, we deal with the bias of  $\tilde{R}_{\text{pu}}(g)$ :

$$\begin{aligned}\sup_{g \in \mathcal{G}} |\tilde{R}_{\text{pu}}(g) - R(g)| &\leq \sup_{g \in \mathcal{G}} |\tilde{R}_{\text{pu}}(g) - \mathbb{E}[\tilde{R}_{\text{pu}}(g)]| + \sup_{g \in \mathcal{G}} |\mathbb{E}[\tilde{R}_{\text{pu}}(g)] - R(g)| \\ &\leq \sup_{g \in \mathcal{G}} |\tilde{R}_{\text{pu}}(g) - \mathbb{E}[\tilde{R}_{\text{pu}}(g)]| + C_\ell \pi_p \Delta,\end{aligned}\quad (16)$$

where we followed the assumption that  $\inf_{g \in \mathcal{G}} R_{\text{n}}^-(g) \geq \alpha > 0$  and Theorem 2.

Secondly, we apply McDiarmid's inequality to the uniform deviation  $\sup_{g \in \mathcal{G}} |\tilde{R}_{\text{pu}}(g) - \mathbb{E}[\tilde{R}_{\text{pu}}(g)]|$  to get that with probability at least  $1 - \delta$ ,

$$\sup_{g \in \mathcal{G}} |\tilde{R}_{\text{pu}}(g) - \mathbb{E}[\tilde{R}_{\text{pu}}(g)]| - \mathbb{E}[\sup_{g \in \mathcal{G}} |\tilde{R}_{\text{pu}}(g) - \mathbb{E}[\tilde{R}_{\text{pu}}(g)]|] \leq C'_\delta \cdot \chi_{n_p, n_u}. \quad (17)$$

Notice that this concentration inequality is single-sided even though the uniform deviation itself is double-sided, which is different from the non-uniform deviation in Theorem 2.

Thirdly, we make *symmetrization* [50]. Suppose that  $(\mathcal{X}'_p, \mathcal{X}'_u)$  is a *ghost sample*, then

$$\begin{aligned}\mathbb{E}[\sup_{g \in \mathcal{G}} |\tilde{R}_{\text{pu}}(g) - \mathbb{E}[\tilde{R}_{\text{pu}}(g)]|] &= \mathbb{E}_{(\mathcal{X}_p, \mathcal{X}_u)}[\sup_{g \in \mathcal{G}} |\tilde{R}_{\text{pu}}(g) - \mathbb{E}_{(\mathcal{X}'_p, \mathcal{X}'_u)}[\tilde{R}_{\text{pu}}(g)]|] \\ &\leq \mathbb{E}_{(\mathcal{X}_p, \mathcal{X}_u), (\mathcal{X}'_p, \mathcal{X}'_u)}[\sup_{g \in \mathcal{G}} |\tilde{R}_{\text{pu}}(g; \mathcal{X}_p, \mathcal{X}_u) - \tilde{R}_{\text{pu}}(g; \mathcal{X}'_p, \mathcal{X}'_u)|],\end{aligned}$$

where we applied *Jensen's inequality* twice since the absolute value and the supremum are convex. By decomposing the difference  $|\tilde{R}_{\text{pu}}(g; \mathcal{X}_p, \mathcal{X}_u) - \tilde{R}_{\text{pu}}(g; \mathcal{X}'_p, \mathcal{X}'_u)|$ , we can know that

$$\begin{aligned}&|\tilde{R}_{\text{pu}}(g; \mathcal{X}_p, \mathcal{X}_u) - \tilde{R}_{\text{pu}}(g; \mathcal{X}'_p, \mathcal{X}'_u)| \\ &= |\pi_p \hat{R}_p^+(g; \mathcal{X}_p) - \pi_p \hat{R}_p^+(g; \mathcal{X}'_p) \\ &\quad + \max\{0, \hat{R}_u^-(g; \mathcal{X}_u) - \pi_p \hat{R}_p^-(g; \mathcal{X}_p)\} - \max\{0, \hat{R}_u^-(g; \mathcal{X}'_u) - \pi_p \hat{R}_p^-(g; \mathcal{X}'_p)\}| \\ &\leq \pi_p |\hat{R}_p^+(g; \mathcal{X}_p) - \hat{R}_p^+(g; \mathcal{X}'_p)| + \pi_p |\hat{R}_p^-(g; \mathcal{X}_p) - \hat{R}_p^-(g; \mathcal{X}'_p)| + |\hat{R}_u^-(g; \mathcal{X}_u) - \hat{R}_u^-(g; \mathcal{X}'_u)|\end{aligned}$$

where we employed  $|\max\{0, z\} - \max\{0, z'\}| \leq |z - z'|$ . This decomposition results in

$$\begin{aligned}\mathbb{E}[\sup_{g \in \mathcal{G}} |\tilde{R}_{\text{pu}}(g) - \mathbb{E}[\tilde{R}_{\text{pu}}(g)]|] &\leq \pi_p \mathbb{E}_{\mathcal{X}_p, \mathcal{X}'_p}[\sup_{g \in \mathcal{G}} |\hat{R}_p^+(g; \mathcal{X}_p) - \hat{R}_p^+(g; \mathcal{X}'_p)|] \\ &\quad + \pi_p \mathbb{E}_{\mathcal{X}_p, \mathcal{X}'_p}[\sup_{g \in \mathcal{G}} |\hat{R}_p^-(g; \mathcal{X}_p) - \hat{R}_p^-(g; \mathcal{X}'_p)|] \\ &\quad + \mathbb{E}_{\mathcal{X}_u, \mathcal{X}'_u}[\sup_{g \in \mathcal{G}} |\hat{R}_u^-(g; \mathcal{X}_u) - \hat{R}_u^-(g; \mathcal{X}'_u)|].\end{aligned}\quad (18)$$

Fourthly, we relax those expectations in (18) to Rademacher complexities. The original  $\ell$  may miss the origin, i.e.,  $\ell(0, y) \neq 0$ , with which we need to cope. Let

$$\tilde{\ell}(t, y) = \ell(t, y) - \ell(0, y)$$

be a *shifted loss* so that  $\tilde{\ell}(0, y) = 0$ . Note that for all  $t, t' \in \mathbb{R}$  and  $y = \pm 1$ ,

$$\ell(t, y) - \ell(t', y) = \tilde{\ell}(t, y) - \tilde{\ell}(t', y).$$

Hence,

$$\begin{aligned}
\widehat{R}_p^+(g; \mathcal{X}_p) - \widehat{R}_p^+(g; \mathcal{X}'_p) &= (1/n_p) \sum_{x_i \in \mathcal{X}_p} \ell(g(x_i), +1) - (1/n_p) \sum_{x'_i \in \mathcal{X}'_p} \ell(g(x'_i), +1) \\
&= (1/n_p) \sum_{i=1}^{n_p} (\ell(g(x_i), +1) - \ell(g(x'_i), +1)) \\
&= (1/n_p) \sum_{i=1}^{n_p} (\tilde{\ell}(g(x_i), +1) - \tilde{\ell}(g(x'_i), +1)).
\end{aligned}$$

This is already a standard form where we can attach Rademacher variables to every  $\tilde{\ell}(g(x_i), +1) - \tilde{\ell}(g(x'_i), +1)$ , and it is a routine work to show that

$$\mathbb{E}_{\mathcal{X}_p, \mathcal{X}'_p} [\sup_{g \in \mathcal{G}} |\widehat{R}_p^+(g; \mathcal{X}_p) - \widehat{R}_p^+(g; \mathcal{X}'_p)|] \leq 2\mathfrak{R}_{n_p, p_p}(\tilde{\ell}(\cdot, +1) \circ \mathcal{G}).$$

The other two expectations can be handled analogously. As a result, (18) can be reduced to

$$\begin{aligned}
\mathbb{E}[\sup_{g \in \mathcal{G}} |\widetilde{R}_{pu}(g) - \mathbb{E}[\widetilde{R}_{pu}(g)]|] &\leq 2\pi_p \mathfrak{R}'_{n_p, p_p}(\tilde{\ell}(\cdot, +1) \circ \mathcal{G}) \\
&\quad + 2\pi_p \mathfrak{R}'_{n_p, p_p}(\tilde{\ell}(\cdot, -1) \circ \mathcal{G}) + 2\mathfrak{R}'_{n_u, p}(\tilde{\ell}(\cdot, -1) \circ \mathcal{G}). \quad (19)
\end{aligned}$$

Finally, we transform the Rademacher complexities of composite function classes in (19) to those of the original function class. It is obvious that  $\tilde{\ell}$  shares the same Lipschitz constant  $L_\ell$  with  $\ell$ , and consequently

$$\begin{aligned}
\mathfrak{R}'_{n_p, p_p}(\tilde{\ell}(\cdot, +1) \circ \mathcal{G}) &\leq 2L_\ell \mathfrak{R}'_{n_p, p_p}(\mathcal{G}) = 2L_\ell \mathfrak{R}_{n_p, p_p}(\mathcal{G}) \\
\mathfrak{R}'_{n_p, p_p}(\tilde{\ell}(\cdot, -1) \circ \mathcal{G}) &\leq 2L_\ell \mathfrak{R}'_{n_p, p_p}(\mathcal{G}) = 2L_\ell \mathfrak{R}_{n_p, p_p}(\mathcal{G}) \\
\mathfrak{R}'_{n_u, p}(\tilde{\ell}(\cdot, -1) \circ \mathcal{G}) &\leq 2L_\ell \mathfrak{R}'_{n_u, p}(\mathcal{G}) = 2L_\ell \mathfrak{R}_{n_u, p}(\mathcal{G}),
\end{aligned} \quad (20)$$

where we used Talagrand's contraction lemma and the assumption that  $\mathcal{G}$  is closed under negation. Combining (16), (17), (19) and (20) finishes the proof of the uniform deviation bound (15).  $\square$

## B.5 Proof of Theorem 4

Based on Lemma 5, the estimation error bound (13) is proven through

$$\begin{aligned}
R(\tilde{g}_{pu}) - R(g^*) &= \left( \widetilde{R}_{pu}(\tilde{g}_{pu}) - \widetilde{R}_{pu}(g^*) \right) + \left( R(\tilde{g}_{pu}) - \widetilde{R}_{pu}(\tilde{g}_{pu}) \right) + \left( \widetilde{R}_{pu}(g^*) - R(g^*) \right) \\
&\leq 0 + 2 \sup_{g \in \mathcal{G}} |\widetilde{R}_{pu}(g) - R(g)| \\
&\leq 16L_\ell \pi_p \mathfrak{R}_{n_p, p_p}(\mathcal{G}) + 8L_\ell \mathfrak{R}_{n_u, p}(\mathcal{G}) + 2C'_\delta \cdot \chi_{n_p, n_u} + 2C_\ell \pi_p \Delta,
\end{aligned}$$

where  $\widetilde{R}_{pu}(\tilde{g}_{pu}) \leq \widetilde{R}_{pu}(g^*)$  by the definition of  $\tilde{g}_{pu}$ .  $\square$
